# Supplementary material
Source: PubMed Central journal article supplement (PMC1850973)
Supplement: NIHMS16151-supplement-legends.pdf [file NIHMS16151-supplement-legends.pdf]

## **Supplementary Materials**

### **Movie S1. Time-lapse images of LC behaviors after topical application of vehicle alone.**

Dynamic behaviors of EGFP<sup>+</sup> LCs were recorded every 2 minutes in anesthetized I-A $\beta$ -EGFP mice 30 hours after topical application of vehicle alone. The same dataset shown in Fig. 1a was compiled to produce this video.

### **Movie S2. Time-lapse images of LC behaviors after topical application of DNFB.**

Dynamic behaviors of EGFP<sup>+</sup> LCs were recorded every 2 minutes in anesthetized I-A $\beta$ -EGFP mice 30 hours after topical application of 0.5% DNFB. The same dataset shown in Fig. 1a was compiled to produce this video.

### **Movie S3. Time-lapse images of LC behavioral responses to locally injected PBS alone.**

Dynamic behaviors of EGFP<sup>+</sup> LCs were recorded every 2 minutes in anesthetized I-A $\beta$ -EGFP mice 6-8 hours after s.c. injection of PBS alone.

### **Movie S4. Time-lapse images of LC behavioral responses to locally injected IL-1 $\alpha$ .**

Dynamic behaviors of EGFP<sup>+</sup> LCs were recorded every 2 minutes in anesthetized I-A $\beta$ -EGFP mice 6-8 hours after s.c. injection of IL-1 $\alpha$  (50 ng/animal).

### **Movie S5. Time-lapse images of LC behavioral responses to locally injected TNF $\alpha$ .**

Dynamic behaviors of EGFP<sup>+</sup> LCs were recorded every 2 minutes in anesthetized I-A $\beta$ -EGFP mice 6-8 hours after s.c. injection of TNF $\alpha$  (50 ng/animal).

**Movie S6. Time-lapse images of LC behavioral responses to locally injected IL-1 $\alpha$  plus TNF $\alpha$ .** Dynamic behaviors of EGFP<sup>+</sup> LCs were recorded every 2 minutes in anesthetized I-A $\beta$ -EGFP mice 6-8 hours after s.c. injection of a combination of IL-1 $\alpha$  (50 ng/animal) and TNF $\alpha$  (50 ng/animal).
